# Supplementary material for: Postoperative Complication and Reoperation Rates Following Resection of Soft Tissue vs. Bone Malignancies Based on Anatomic Location in the Inpatient Setting
Source: Sarcoma. 2023 Mar 10;2023:5455719. doi: 10.1155/2023/5455719 (PMC10023224; doi:10.1155/2023/5455719)
Supplement: Supplementary Materials — Supplementary Table 1. ICD-10 diagnosis codes and procedure codes. Supplementary Table 2. ICD-10 diagnosis codes for complications. [file 5455719.f1.zip]

Archive with 2 entries (2 files):
- Supplemental Table 1 (1).docx
- Supplemental Table 2 (1).docx
